# Supplementary material for: Comparison of Channel Catfish and Blue Catfish Gut Microbiota Assemblages Shows Minimal Effects of Host Genetics on Microbial Structure and Inferred Function
Source: PubMed Central journal article supplement (PMC5974930; doi:10.3389/fmicb.2018.01073), 2018-05-23
Supplement: Presentation_1.pdf [file Presentation_1.pdf]

# Comparison of channel catfish and blue catfish gut microbiota assemblages shows minimal effects of host genetics on microbial structure and inferred function

**Jacob W. Bledsoe\*, Geoffrey C. Waldbieser, Kelly S. Swanson,  
Brian C. Peterson, Brian C. Small**

**\* Corresponding Author: [bledsoe@uidaho.edu](mailto:bledsoe@uidaho.edu)**

## Supplementary Figures and Tables

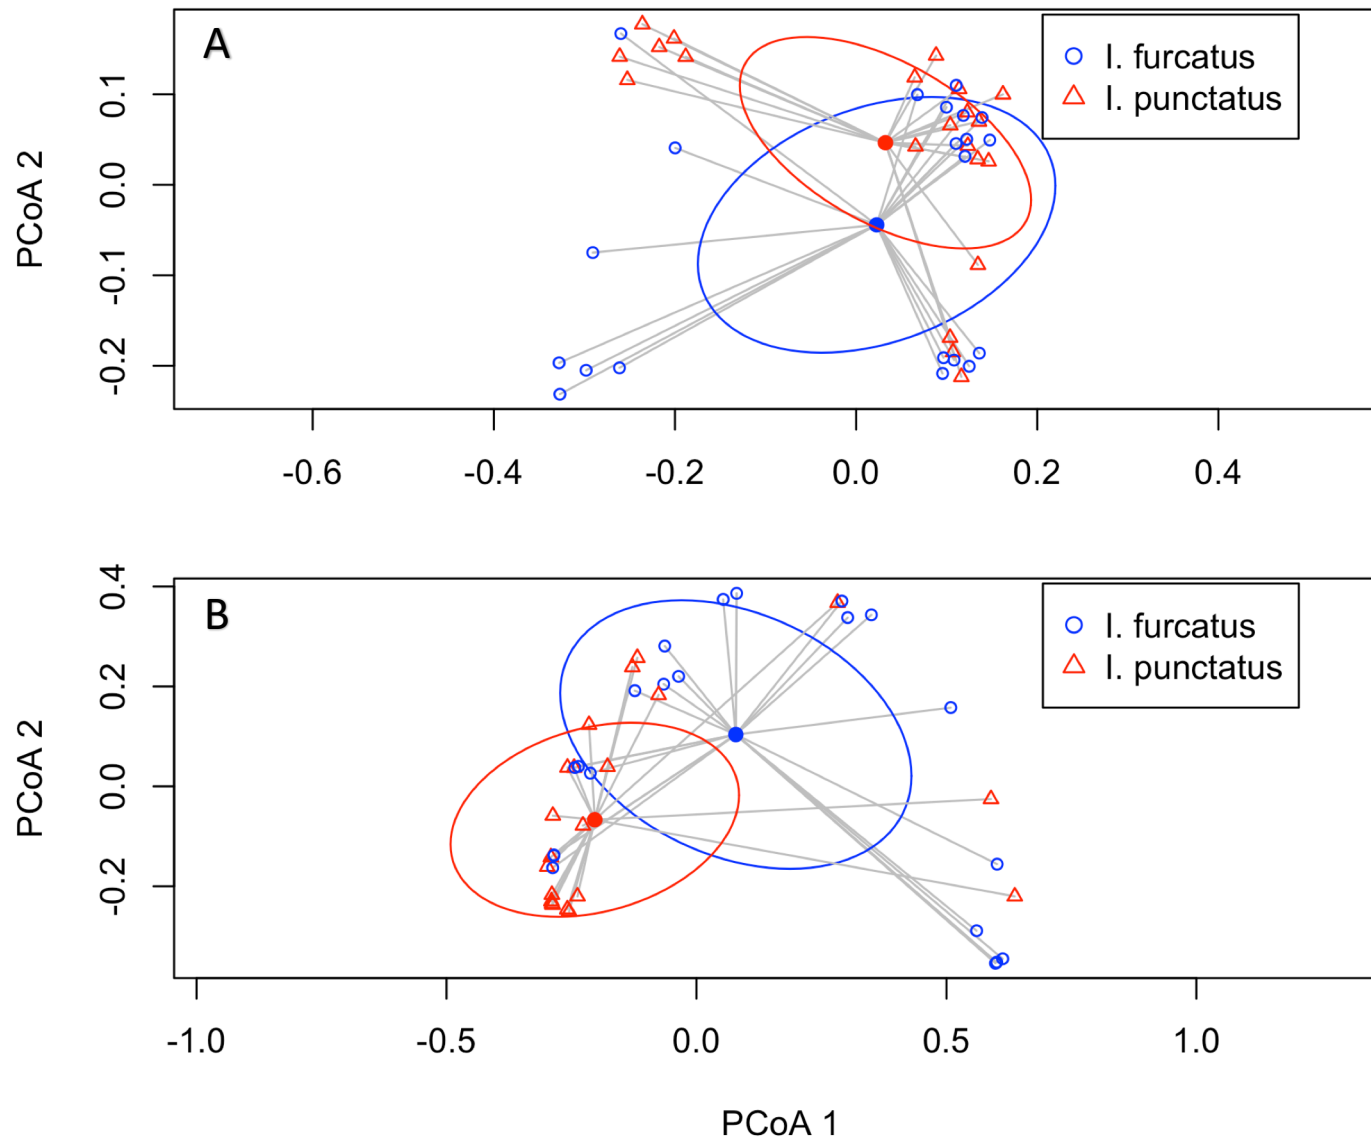

**Supplemental Figure S1.** Principal coordinates analysis (PCoA) plots showing the multivariate dispersion of (A) unweighted UniFrac and (B) weighted UniFrac beta diversity of the gut microbiota of blue catfish *I. furcatus* (blue circles; n = 21) and channel catfish *I. punctatus* (red triangles; n = 21). Filled circles represent the group centroids and ellipses represent 1 standard deviation of multivariate dispersion from the centroid.

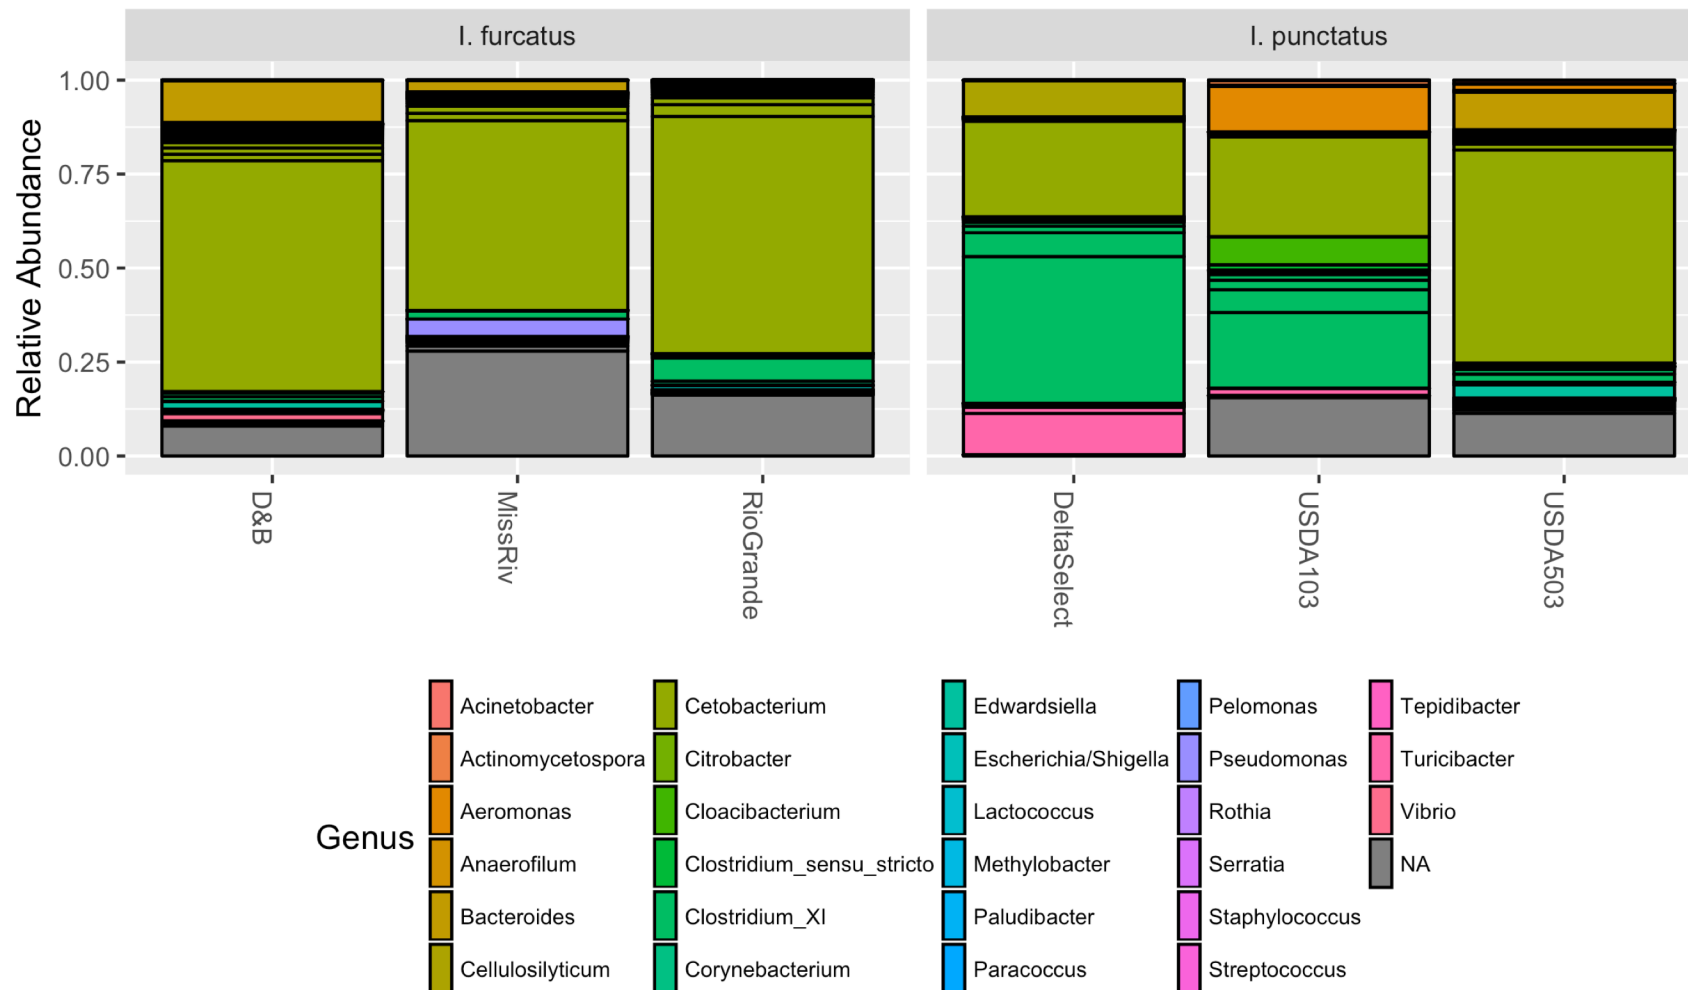

**Supplemental Figure S2.** Genus level RDP v14 taxonomy applied to the 16S rRNA V4 gene amplicons detected in gut-associated microbiota samples taken from strains of blue *I. furcatus* ( $n = 21$ ) and channel catfish *I. punctatus* ( $n = 21$ ) at 193 days post hatch. Reads assigned to Cyanobacteria/Chloroplast, NA, or unknown at the phylum level, samples with less than 10,000 processed reads, and sequence variants accounting for less than  $1e^{-5}$  of the relative abundance were removed prior to plotting. Results are displayed as mean relative abundance for each fish strain, with horizontal black lines delineating the abundance of unique 16S rRNA V4 gene sequence variants assigned within a single genus. Only the top 200 most abundant sequence variants are included.

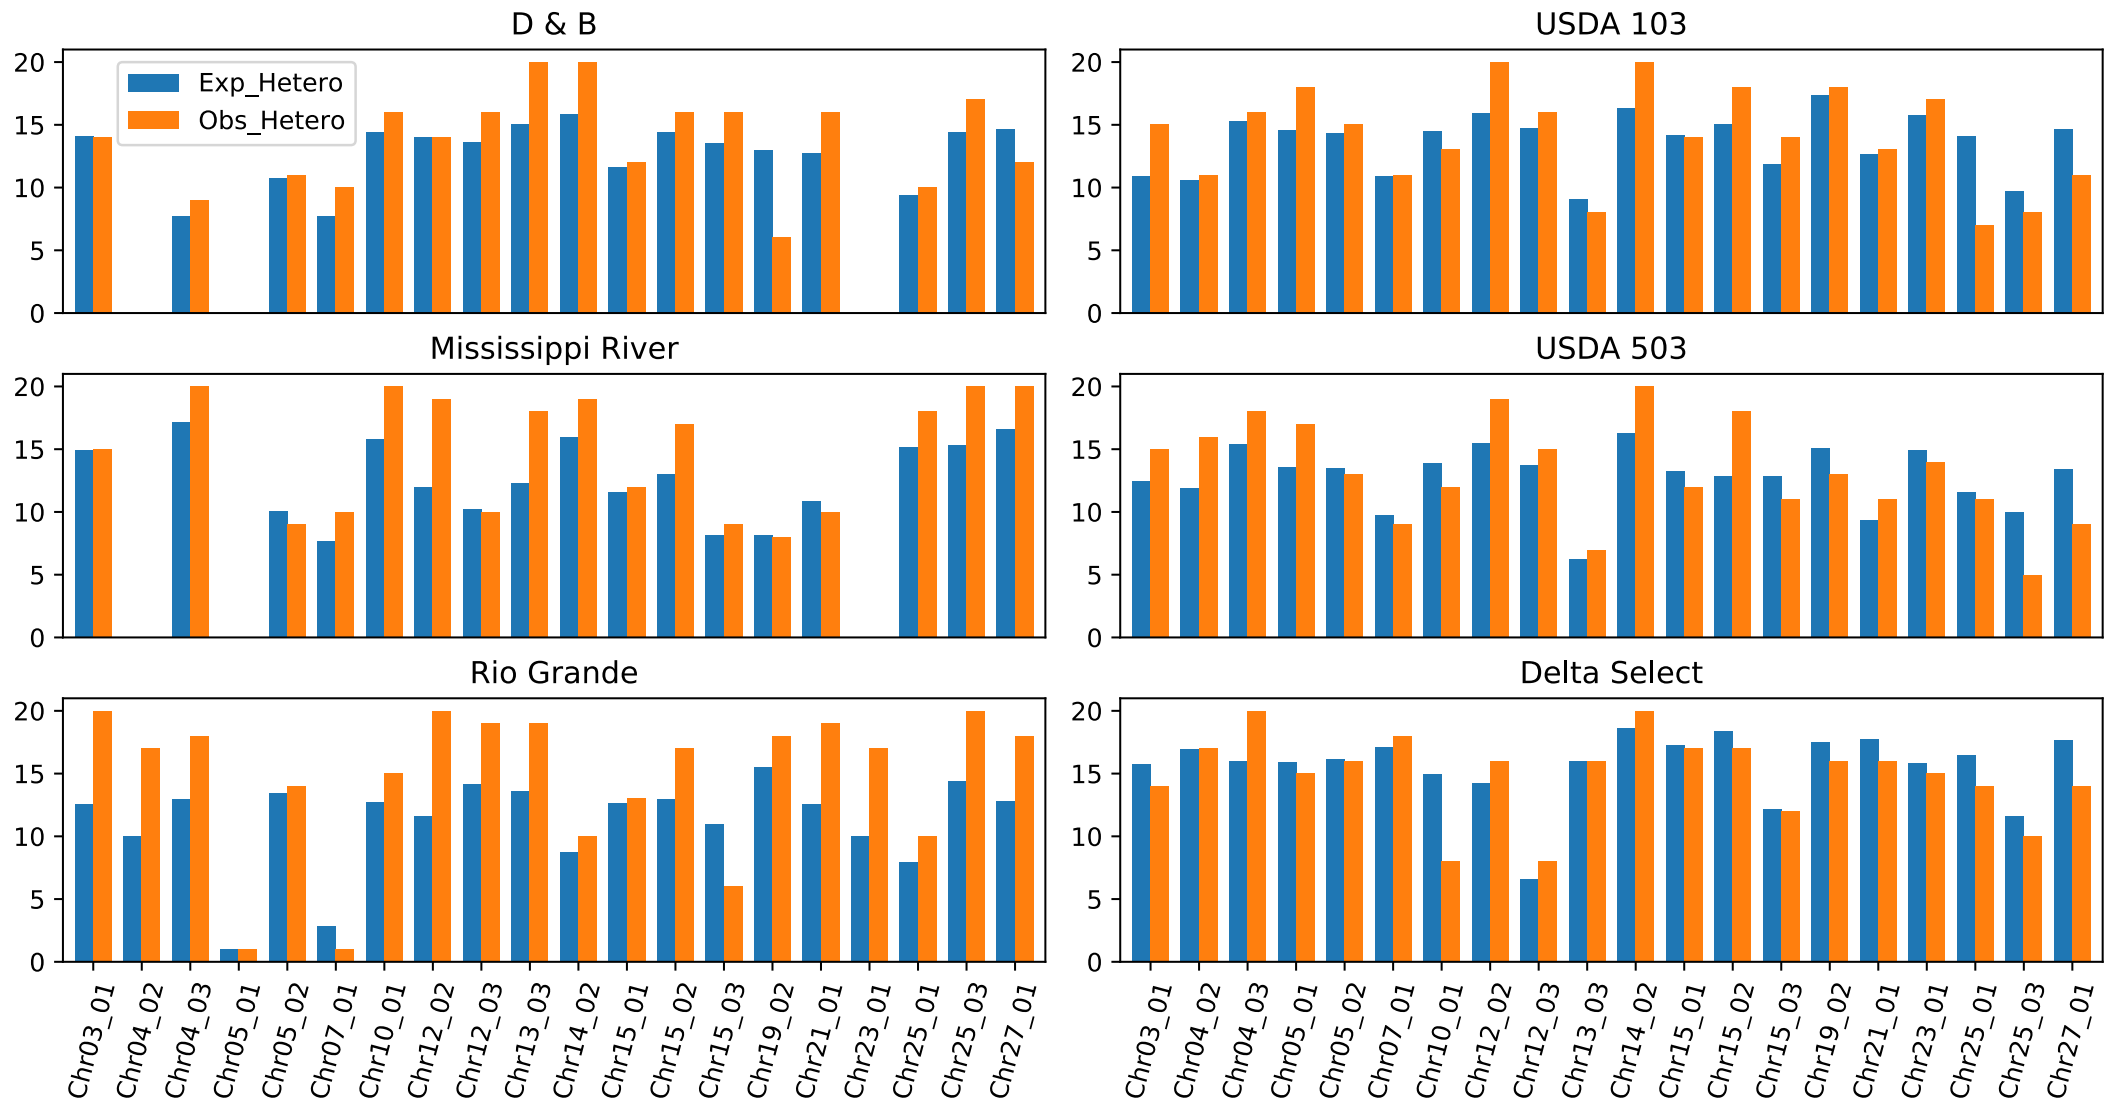

**Supplemental Figure S3.** Observed (orange) and expected (blue) heterozygosity for each fish strain ( $n = 20$ ) across the 20 microsatellite loci included in the study. Expected values represent the heterozygosity under Hardy-Weinberg equilibrium. Left panels are strains of blue catfish *I. furcatus* and right panels are strains of channel catfish *I. punctatus*. PCR primers and repeat motifs used in this analysis can be found in Supplemental Table 2.

**Supplemental Table S1.** Proximate analysis of commercial diet being fed at the time of sampling.

| <b>Diet</b>             | <b>Pellet Size<br/>(mm)</b> | <b>Dry Matter<br/>(%)</b> | <b>Crude Protein<br/>(%)</b> | <b>Crude Fat<br/>(%)</b> | <b>Ash<br/>(%)</b> |
|-------------------------|-----------------------------|---------------------------|------------------------------|--------------------------|--------------------|
| MiniPellet <sup>A</sup> | 2.4                         | 90.7                      | 34.4                         | 4.5                      | 8                  |

<sup>A</sup> Fishbelt Feeds Inc., MS, US. – Diet is a lost-cost formulation with varied ingredient formulations from batch to batch.

**Supplemental Table S2.** Locus specific metadata for multiplexed PCR-sequencing based microsatellite analysis conducted within this study.

| Locus    | Repeat Motif | Forward Primer (5' - 3')   | Reverse Primer (5' - 3')            | Position in Reference Genome ( <i>I. punctatus</i> ) |
|----------|--------------|----------------------------|-------------------------------------|------------------------------------------------------|
| Chr03_01 | AC           | GTTATTTCTACTACTGGCTACTGTAC | AAGCCTGGAGTATGTGCAGGCT              | 31,041,248                                           |
| Chr04_02 | AAG          | CTTCCTCATACAGCACACAG       | CGCGCTTTCATAAACAGGAAGTGGCACTG       | 30,690,440                                           |
| Chr04_03 | AAT          | TAACCTGCTCTAGTCTACAT       | GCAAATAAATCAAAACCTGAGT              | 819,886                                              |
| Chr05_01 | AAAT         | ACTCGGTCTTGGGCTTTAG        | ATTGGTTTCGAAACCTCATCCGTCTCCGAC      | 1,833,406                                            |
| Chr05_02 | AAT          | AGTGCACATTTTAAAGACTGGC     | CACAAGGGCAACTGAGATGGAT              | 28,637,866                                           |
| Chr07_01 | ATT          | TTGTAAGTGACCTTGGTTGTGA     | ATTAAATCTAATTTTCAGTATGGGC           | 4,954,699                                            |
| Chr10_01 | AAG          | GATTAGTACAACATGAAAACACAAGA | CCGAGATTCATTTGTCTGGTCATGTC          | 18,379,264                                           |
| Chr12_02 | AG           | TCAACCTGGTCACTTAACTCTG     | AATTAGGATAGAGAGAAATTAATAGAAAGCAAGAT | 13,610,928                                           |
| Chr12_03 | AAG          | CTACAGTTTGGTCCGTATGATC     | GCTAGGGAAAGAAAGTTGGCA               | 1,882,749                                            |
| Chr13_03 | AAT          | GGTAGGAACTGGCCAAAATGG      | CCAATGAGGACAACAAATTTTGTGTTCAGTTG    | 19,015,384                                           |
| Chr14_02 | AG           | AAACAGCCCAAGGCCAAAGG       | TTGTTGTCACTCAATTCCTATGTA            | 24,191,069                                           |
| Chr15_01 | ATAG         | ATCATTATCTGTGACATTTTATGG   | TCTCAATTAAGGGCAATTTACAGA            | 1,070,242                                            |
| Chr15_02 | AAC          | ACTGAATGACTAAGGAGAAAAC     | AAGCATGATAAAGAAAGAAAAA              | 22,338,963                                           |
| Chr15_03 | AGT          | CAAGAATGGGAAGGGTGTACTTA    | ATATTGCACATGCACATATGCA              | 19,465,810                                           |
| Chr19_02 | ATAG         | TACCACCTGAGCCACAGCTG       | CAGCAGTTAGTGAAAGCCCAGTT             | 20,156,330                                           |
| Chr21_01 | ATAG         | CGTGTCCACCAAGTCCCTG        | GTCCTCAAAGAGGAATTT                  | 6,796,744                                            |
| Chr23_01 | ATGG         | GATGTTTCAGTGCATTTACTCTG    | GCCAGTAAAAAGACAGCTCATCCTGAGATAG     | 572,870                                              |
| Chr25_01 | AAT          | GGCGGTACTGTCCCTGTATG       | CAGAAAATGTATACTCTTTTCCAAT           | 18,118,630                                           |
| Chr25_03 | AAT          | TCCCACTAACTCCATTGTACC      | CATCAGATTATCACCAGGATCA              | 1,474,793                                            |
| Chr27_01 | AAT          | CCAATACTGTGATTTAATTTACAATG | TATTTATTCATTTAATATTTACTTGTGTT       | 10,417,665                                           |
